# Supplementary material for: Proximal 4p Deletion Syndrome in a Woman With Developmental Delay: A Case Report and Literature Review
Source: Research Square preprint supplement (doi:10.21203/rs.3.rs-7165207/v1), 2025-08-07
Supplement: Supplementary file 1 [file 79e92e93694d311c5d26558d.xlsx]

## Sheet: Sheet1
Table 1 Phenotypic features of 4p interstitial deletion syndrome with overlapping deletion compared to our patient
	Our case	Romain et al., 1985	Davies et al., 1990	Estabrooks et al., 1993	Chitayat et al., 1995		White et al.,1995			Innes, A. M et al.,1999	Tonk et al.,2003		Kojima, T et al.,2006	Basinko, A et al., 2008	Bailey et al., 2010	Li, D .et al.,2022	Pang, Y.et al.,2024	Total
Deleted region	4p15.32-16.2	4p15.2-15.33	4p15.2– 16.1	4p15.31-16.3	4p15.2-15.33	4p15.2-15.33	4p14-16.1 (NO.1)	4p15.2-16.1 (NO.2)	4p15.1-16.1 (NO.3-6)	4p15.2-16.1	4p15.2-16.1	4p15.2-16.1	4p15.2-16.3	4p15.33–16.3	4p14-15.33	4p15.32-16.1	4p14-15.33	20
Age	20y	32y	15.6y	9 m	10y	11y	14y	5m	10y	3y	35y	6y	16y	15y	2y	27m	7m
Sex	F	F	M	M	M	F	M	F	F	F	F	F	M	M	F	F	M
Long face	-	-	-	-	+	+	+	+	-	-	+	+	+	-	-	-	-	7/20
Upslanted fissures	-	-	-	-	-	+	+	+	+	-	-	-	-	-	+	+	-	6/20
Epicanthal folds	-	-	-	-	-	-	+	+	+	-	+	+	-		+	-	-	5/20
Large beaked nose	-	-	-	+	+	+	+	-	+	-	+	+	-	+	+	-	+	10/20
High or cleft palate	-	-	-	-	+	+	+	+	+	-	-	-	-	-	-	-	-	5/20
Thick lower lip	-	-	-	-	+	-	+	+	+	+	+	+	-	-	-	-	-	7/20
Micrognathia	-	-	-	-	-	-	+	+	+	-	-	-	+	+	-	-	-	5/20
Broad/short neck	-	-	-	-	+	+	+	+	-	-	-	-	-	-	-	-	-	4/20
Broad hands/feet	-	-	-	-	+	-	+	+	+	+	-	-	-	-	-	-	-	5/20
Tall, thin habitus	+	n/r	+	-	+	+	+	+	+	-	+	+	-	+	-	-	-	10/20
Mental retardation	+	+	+	+	+	+	+	+	+	+	+	+	+	+	+	+	+	20/20
Hypotonia	-	+	-	+	-	+	+	+	+	-	-	-	-	-	+	+	+	10/20
Epilepsy	-	-	-	-	-	-	-	-	-	-	-	-	+	-	-	-	-	1/20
Congenital heart disease	-	-	-	-	-	n/r	+	+	-	-	-	-	-	-	+	-	+	4/20
Cryptorchidism	-	n/r	-	-	+	n/r	+	-	-	-	-	-	-	-	n/r	-	-	2/20
Studies are listed by the name of the first author. M: male; F: female; n/r: not reported; y: years; mo: months; nb: newborn; +: present; –: absent.
