# Supplementary material for: Proximal 4p Deletion Syndrome in a Woman With Developmental Delay: A Case Report and Literature Review
Source: Research Square preprint supplement (doi:10.21203/rs.3.rs-7165207/v1), 2025-08-07
Supplement: Supplementary file 2 [file ba840c8c44b7f9c2012a171c.xlsx]

## Sheet: Sheet1
	Case Index	Deleted region	Age	Sex	Long face	Upslanted palpebral fissures	Epicanthal folds	Large beaked nose	High or cleft palate	Thick lower lip	Micrognathia	Broad/short neck	Broad hands/feet	Tall, thin habitus	Mental retardation	Hypotonia	Epilepsy	Mid face hypoplasia	Congenital heart disease	Cryptorchidism
Nielsen, J etal., 1977	1	4p12-15	13	F	-	+	-	+	-	-	+	-	-	-	+	-	+	-	-	-
Francke etal., 1977	2	4p11-15.2	30y	F	+	-	+	+	+	-	-	+	+	-	+	-	-	-	-	-
Ray et al.,1984	3	4p12-15	17y	F	-	+	+	+	-	+	+	-	+	+	+	-	-	+	-	-
Romain et al., 1985	4	4p15.2-15.33	32y	F	-	-	-	-	-	-	-	-	-	n/r	+	+	-	-	-	n/r
Davies et al., 1990	5	p15.2– 16.1	15.6y	M	-	-	-	-	-	-	-	-	-	+	+	-	-	-	-	-
Ishikaa et al.,1990	6	4p15.2-15.32	17m	M	-	-	-	-	+	+	+	n/r	n/r	-	+	-	-	-	-	-
Estabrooks et al., 1993	7	4p15.31-16.3	9 m	M	-	-	-	+	-	-	-	-	-	-	+	+	-	-	-	-
Chitayat et al., 1995	8	4p15.2-15.33	10y	M	+	-	-	+	+	+	-	+	+	+	+	-	-	+	-	+
	9	4p15.2-15.33	11y	F	+	+	-	+	+	-	-	+	-	+	+	+	-	+	n/r	n/r
	10	4p14-15.2	25y	M	+	n/r	+	-	+	-	+	n/r	+	-	+	-	-	+	+	+
Fryns etal.,1995	11	4p14-15.3	6.5y	M	+	+	+	-	-	+	+	-	-	+	+	+	-	+	-	+
White et al.,1995	12	4p14-16.1	14y	M	+	+	+	+	+	+	+	+	+	+	+	+	-	+	+	+
	13	4p15.2-16.1	5m	F	+	+	+	-	+	+	+	+	+	+	+	+	-	+	+	-
	17（3-6）	4p15.1-16.1	10y	F	-	+	+	+	+	+	+	-	+	+	+	+	-	+	-	-
	18	4p14-15.32	7y	F	-	+	+	-	-	+	-	+	-	+	+	+	-	+	-	-
de Graaf GV et al.,1997	19	4p12-15.1	7y	F	+	+	-	-	-	-	-	-	-	-	+	-	-	-	-	n/r
Innes, A. M et al.,1999	20	4p15.2-16.1	3y	F	-	-	-	-	-	+	-	-	+	-	+	-	-	-	-	-
Tonk et al.,2003	21	4p15.2-16.1	35y	F	+	-	+	+	-	+	-	-	-	+	+	-	-	+	-	-
	22	4p15.2-16.1	6y	F	+	-	+	+	-	+	-	-	-	+	+	-	-	+	-	-
Kojima, T et al.,2006	23	4p15.2-16.3	16y	M	+	-	-	-	-	-	+	-	-	-	+	-	+	-	-	-
Moller et al.,2007	24	4p15.1-15.31	38y	F	+	-	-	+	-	+	-	-	-	-	+	-	-	+	-	n/r
Basinko, A et al., 2008	25	4p15.33–16.3	15y	M	-	-	-	+	-	-	+	-	-	+	+	-	-	-	-	-
Gawlik- Kuklinska et al., 2008	26	4p14-15.32	4y	M	+	+	+	+	+	+	+	+	+	+	+	+	-	+	+	-
Bailey et al., 2010	27	4p14-15.33	2y	F	-	+	+	+	-	-	-	-	-	-	+	+	-	-	+	n/r
Su, P. H et al.,2011	28	4p12-15.2	7y	F	+	+	+	+	-	+	-	+	-	-	+	+	-	+	-	-
Alesi et al.,2011	29	4p15.31-15.32	14m	M	-	+	-	+	-	-	+	-	-	+	-	-	-	-	-	-
Chen et al. 2013	30	4p14-15.2	Prenatal	n/r	n/r	n/r	n/r	n/r	n/r	n/r	n/r	n/r	n/r	n/r	n/r	n/r	n/r	n/r	n/r	n/r
Nakayama, T et al. 2014	31	4p15.2	2y	F	-	+	+	+	-	+	+	+	-	-	+	-	-	-	-	-
Mitroi et al., 2017	32	4p15.1-15.31	3y	M	+	-	-	+	+	+	-	-	+	-	+	-	+	+	-	+
Park, S.et al.,2020	33	4p15.1-15.31	5y	M	-	-	-	-	-	-	-	-	-	-	+	-	-	-	+	+
Li, D .et al.,2022	34	4p15.32-16.1	27m	F	-	+	-	-	-	-	-	-	-	-	+	+	-	+	-	-
Jing Di.et al.,2022	35	4p14-15.2	3y	F	-	+	-	+	-	-	+	-	-	+	+	-	-	+	+	-
	36	4p14-15.2	23y	F	-	+	-	+	-	-	+	-	-	+	+	-	-	+	+	-
Pang, Y.et al.,2024	37	4p14-15.33	7m	M	-	-	-	+	-	-	-	-	-	-	+	+	-	+	+	-
